# Supplementary material for: Preparation of two new polyimide bond linked porous covalent organic frameworks and their fluorescence sensing application for sensitive and selective determination of Fe3+
Source: Royal Society of Chemistry journal article supplement (doi:10.1039/c7nj02134h), 2017-01-01
Supplement: c7nj02134h1.pdf [file c7nj02134h1.pdf]

Submitted to New Journal of Chemistry

## Preparation of two new polyimide bond linked porous covalent organic frameworks and their fluorescent sensing application for sensitive and selective determination of $\text{Fe}^{3+}$

Ting Wang, Rui Xue, Huiqin Chen, Peiling Shi, Xi Lei, Yuli Wei, Guo Hao \*, Yang Wu\*

College of Chemistry and Chemical Engineering, Key Lab of Bioelectrochemistry and Environmental Analysis of Gansu Province, Northwest Normal University, Lanzhou 730070, P R China.

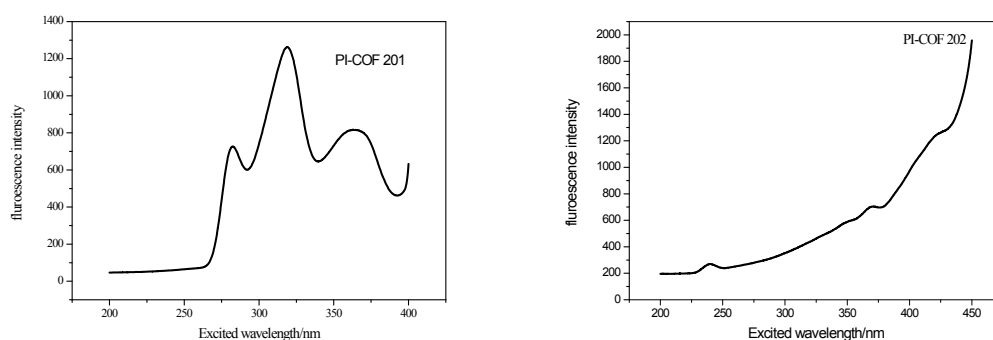

**Figure S1.** Excitation spectra of PI-COF 201 in DMF and PI-COF 202 in acetonitrile.

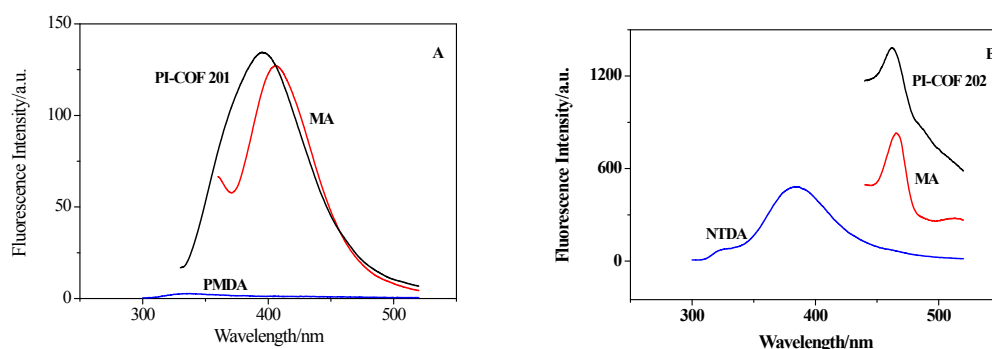

**Figure S2.** Fluorescence spectra of PI-COF 201 and corresponding monomers in DMF excited at  $\lambda_{\text{ex}} = 320.0\text{nm}$ (A) and PI-COF 202 and corresponding monomers in acetonitrile excited at  $\lambda_{\text{ex}} = 370\text{nm}$ (B)

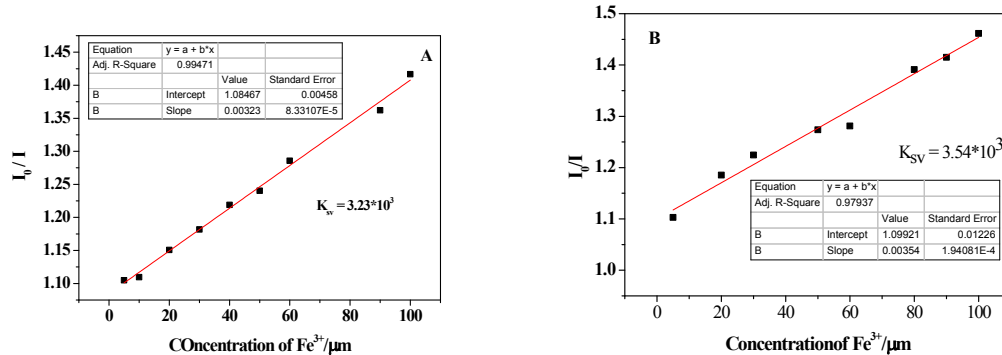

**Figure S3.** Stern–Volmer plots of fluorescence quenching of PI-COF 201(A, in DMF) and PI-COF 202(B, in acetonitrile) nanoparticles (1 mg) with  $Fe^{3+}$ .

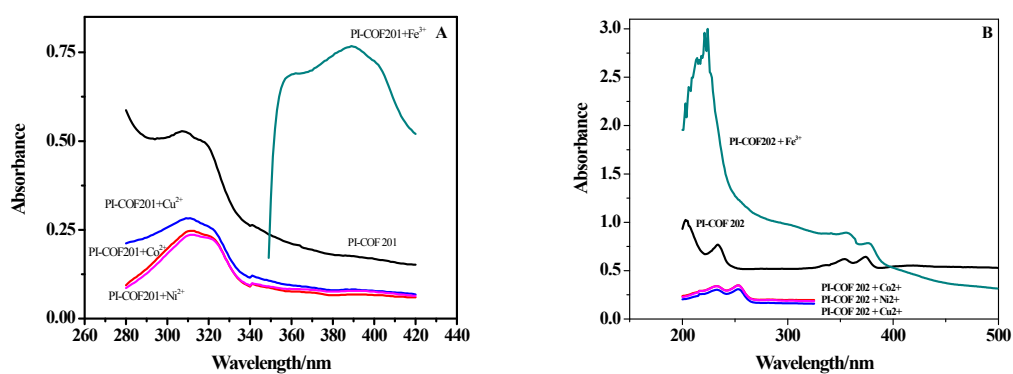

**Figure S4.** Absorption spectra of PI-COF 201 and metal ion incorporated PI-COF 201 suspensions(A) and PI-COF 202 and metal ion incorporated PI-COF 202 suspensions(B) (metal ion =  $Fe^{3+}$ ,  $Co^{2+}$ ,  $Ni^{2+}$  and  $Cu^{2+}$ )
